# Supplementary material
Source: PubMed Central journal article supplement (PMC2915714)
Supplement: supp_M110.130286_jbc.M110.130286-1.pdf [file supp_M110.130286_jbc.M110.130286-1.pdf]

**Supplemental Table 1. Genes induced  $\geq 2.0$ -fold by BMP2 or BMP6 in Hep3B cells**

| Gene     | Accession No. | Gene Name                                                   | Fold Change |      |
|----------|---------------|-------------------------------------------------------------|-------------|------|
|          |               |                                                             | BMP2        | BMP6 |
| ID1      | NM_181353     | Inhibitor of DNA binding 1                                  | 13.2        | 11.2 |
| ID3      | NM_002167     | Inhibitor of DNA binding 3                                  | 11.1        | 9.7  |
| SLC6A19  | NM_001003841  | Solute carrier family 6, member 19                          | 7.2         | 6.3  |
| SMAD6    | NM_005585     | SMAD family member 6                                        | 6.7         | 6.2  |
| SMAD7    | NM_005904     | SMAD family member 7                                        | 4.3         | 4.5  |
| GHR      | NM_000163     | Growth hormone receptor                                     | 4.1         | 4.0  |
| BAMBI    | NM_012342     | BMP and activin membrane-bound inhibitor homolog            | 4.1         | 3.8  |
|          | NR_015379     | urothelial cancer associated 1                              | 4.1         | 3.3  |
| HEY1     | NM_012258     | Hairy/enhancer-of-split related with YRPW motif 1           | 4.0         | 3.9  |
| RASSF5   | NM_182663     | Ras association (RalGDS/AF-6) domain family member 5        | 3.9         | 3.5  |
| SLC29A3  | NM_018344     | Solute carrier family 29, member 3                          | 3.8         | 3.6  |
| DSE      | NM_013352     | Dermatan sulfate epimerase                                  | 3.7         | 3.7  |
| SMAD9    | NM_001127217  | SMAD family member 9                                        | 3.7         | 3.5  |
| PFKFB3   | NM_004566     | 6-phosphofructo-2-kinase/fructose-2,6-biphosphatase 3       | 3.6         | 3.3  |
| GPD1L    | NM_015141     | Glycerol-3-phosphate dehydrogenase 1-like                   | 3.5         | 3.4  |
| ATOX8    | NM_032827     | Atonal homolog 8                                            | 3.4         | 3.9  |
| ID4      | NM_001546     | Inhibitor of DNA binding 4                                  | 3.4         | 2.8  |
| GATA2    | NM_032638     | GATA binding protein 2                                      | 3.2         | 3.1  |
| GATA3    | NM_001002295  | GATA binding protein 3                                      | 3.1         | 3.1  |
| SLCO2A1  | NM_005630     | Solute carrier organic anion transporter family, member 2A1 | 3.1         | 2.9  |
| PAQR8    | NM_133367     | Progesterin and adipoQ receptor family member VIII          | 2.9         | 2.9  |
| DUSP1    | NM_004417     | Dual specificity phosphatase 1                              | 2.9         | 2.2  |
| SAMD11   | NM_152486     | Sterile alpha motif domain containing 11                    | 2.8         | 2.5  |
| SNAI1    | NM_005985     | Snail homolog 1 (Drosophila)                                | 2.8         | 2.7  |
| MCC      | NM_001085377  | Mutated in colorectal cancers                               | 2.7         | 2.9  |
| TBX3     | NM_016569     | T-box 3                                                     | 2.6         | 2.8  |
| SPRY4    | NM_030964     | Sprouty homolog 4 (Drosophila)                              | 2.6         | 2.4  |
| SCNN1A   | NM_001038     | Sodium channel, nonvoltage-gated 1 alpha                    | 2.6         | 2.5  |
| SSTR2    | NM_001050     | Somatostatin receptor 2                                     | 2.5         | 2.6  |
| SNAI2    | NM_003068     | Snail homolog 1 (Drosophila)                                | 2.5         | 2.5  |
| RAB31    | NM_006868     | RAB31, member RAS oncogene family                           | 2.5         | 2.3  |
| PRICKLE1 | NM_153026     | Prickle homolog 1 (Drosophila)                              | 2.4         | 2.6  |
| PITPNC1  | NM_181671     | Phosphatidylinositol transfer protein, cytoplasmic 1        | 2.4         | 2.0  |
| ANKRD1   | NM_014391     | Ankyrin repeat domain 1 (cardiac muscle)                    | 2.3         | 2.0  |
| FZD7     | NM_003507     | Frizzled homolog 7 (Drosophila)                             | 2.2         | 2.4  |
| MTERFD2  | NM_182501     | MTERF domain containing 2                                   | 2.1         | 2.0  |
| FAM169A  | NM_015566     | Family with sequence similarity 169, member A               | 2.1         | 2.4  |
| ETS2     | NM_005239     | V-ets erythroblastosis virus E26 oncogene homolog 2         | 2.1         | 2.1  |
| GRK5     | NM_005308     | G protein-coupled receptor kinase 5                         | 2.0         | 2.1  |
| SPAG1    | NM_003114     | Sperm associated antigen 1                                  | 2.0         | 2.0  |
| DNAJC22  | NM_024902     | DnaJ (Hsp40) homolog, subfamily C, member 22                | 2.0         | 2.2  |
| DLL4     | NM_019074     | Delta-like 4 (Drosophila)                                   | 2.0         | 2.0  |
| ZMIZ1    | NM_020338     | Zinc finger, MIZ-type containing 1                          | 2.0         | 2.1  |

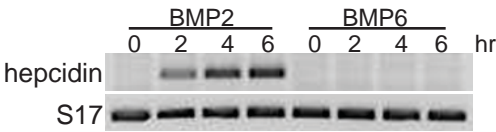

**Supplemental Figure 1.** Induction of hepcidin gene expression in AML12 cells. Time course of accumulation of hepcidin and S17 mRNAs by RT-PCR after incubation of AML12 cells with BMP2 or BMP6 (200 ng/mL) in serum-free medium for 0 – 6 hr.

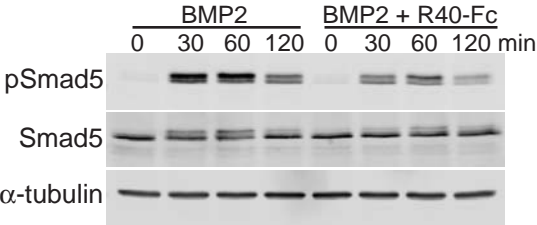

**Supplemental Figure 2.** Time course of RGMc40 inhibition of BMP2-mediated signaling. BMP2 (100 ng/ml) was pre-incubated for 3 hr at 20°C alone (left) or with 20-fold molar excess of RGMc40-Fc (R40-Fc, right). After addition to Hep3B cells for indicated times, pSmad5, Smad5, and α-tubulin were detected by immunoblotting.
